# Supplementary material for: Magnetic resonance imaging and genetic investigation of a case of rottweiler leukoencephalomyelopathy
Source: PubMed Central journal article supplement (PMC3614464; doi:10.1186/1746-6148-9-57), 2013-03-26
Supplement: 1746-6148-9-57-S2.pdf [file 1746-6148-9-57-S2.pdf]

| <b>DARS2</b> | <b>primer</b> | <b>sequence</b>              | <b>product size (bp)</b> |
|--------------|---------------|------------------------------|--------------------------|
| exon 1       | F1            | AAGGCCCCAGATTACTTGTAGA       | 519                      |
|              | R1            | AAGGCAGAATTCATGTGGTT         |                          |
| exon 2       | F2            | ACAGTAAGACTGTTAATTCACCTGGTT  | 490                      |
|              | R2            | TCATTTATTTATTCATGAGAGACACAG  |                          |
| exon 3       | F3            | AAAAGTAAATGCAAAGTCTTTTTGT    | 456                      |
|              | R3            | TTGTCTGTGATATGAGTTGCACA      |                          |
| exon 4       | F4            | TTTAACTTGCTGTTTCATGTGGA      | 480                      |
|              | R4            | AACATGCCTACTCACATTGGTG       |                          |
| exon 5       | F5            | TGAGCTCATCAGCCACAGAT         | 480                      |
|              | R5            | AACCTGTCTGATAAAGCAGCCTA      |                          |
| exon 6       | F6            | CAAACCTTAGAAGTTGTAGGAATTAAGG | 480                      |
|              | R6            | TTAACCTTTCTTCACTGCTTTACA     |                          |
| exon 7       | F7            | TGACAGAAGTATCACCTTATGACCA    | 437                      |
|              | R7            | AAAGCAGACGCTCAACCACT         |                          |
| exon 8       | F8            | GAATTGGGAATTCATTTCAACA       | 610                      |
|              | R8            | AAGGCAGCGCTAAACCACT          |                          |
| exon 9       | F9            | AATTTCTTATGTCCTTTAGGTACCATT  | 808                      |
|              | R9            | GATCCCTGGGTGGCACAG           |                          |
| exon 10      | F10           | CAAACCCCCACCCATGTAT          | 480                      |
|              | R10           | GTA CTGTAGTGCTGACATGCTATTATT |                          |
| exon 11      | F11           | GCCCATGGTAAACACTGTGA         | 499                      |
|              | R11           | AGGGTCTGATCCTGGAGACC         |                          |
| exon 12      | F12           | CATTCATAGTTGTTTCCAGTGAGG     | 500                      |
|              | R12           | AGGATCGAATCCCATGTCAG         |                          |
| exon 13      | F13           | TTTTTATTCCCTTCTGTTTTTGA      | 521                      |
|              | R13           | TGATACAATGCATTATTTAGTGCTCA   |                          |
| exon 14      | F14           | TGCCCAGTCACTGTTACCAA         | 608                      |
|              | R14           | TTTCTGTTCTACAGGTTGAAGTCAC    |                          |
| exon 15      | F15           | AGGAAATGTGGCAACAAAGC         | 506                      |
|              | R15           | CGGTCATTTACTTTTCAGTCTTACA    |                          |
| exon 16      | F16           | CCTGGCTACATTTACTGAGTGC       | 459                      |
|              | R16           | TGCATTTTAAACCTGTATCAACG      |                          |
| exon 17      | F17           | GAAAAGAACCTTTCAGACAGACAGA    | 562                      |
|              | R17           | TCCCCAAAATCCTAATAATGC        |                          |
| exon 18      | F18           | AACTGCATTACATGCCAGTCTA       | 429                      |
|              | R18           | AAATTTACTGCCAGTCTTGAAA       |                          |
